# Supplementary material for: Aerosol delivery of biocompatible dihydroergotamine-loaded PLGA-PSPE polymeric micelles for efficient lung cancer therapy
Source: Royal Society of Chemistry journal article supplement (doi:10.1039/c7py00024c), 2017-01-01
Supplement: c7py00024c1.pdf [file c7py00024c1.pdf]

## Supporting Information for

### **Aerosol delivery of biocompatible dihydroergotamine-loaded PLGA-PSPE polymeric micelles for efficient lung cancer therapy**

Jian-Bin Qiao<sup>a,b,c,†</sup>, Yoonjeong Jang<sup>d,†</sup>, Qian-Qian Fan<sup>a,†</sup>, Seung-Hee Chang<sup>d</sup>, Lei Xing<sup>a,b,c</sup>, Peng-Fei Cui<sup>a</sup>, Yu-Jing He<sup>a</sup>, Soomin Lee<sup>d</sup>, Sunghyun Hwang<sup>d</sup>, Myung-Haing Cho<sup>d,\*</sup>, and Hu-Lin Jiang<sup>a,b,c,\*</sup>

<sup>a</sup> State Key Laboratory of Natural Medicines, Department of Pharmaceutics, China Pharmaceutical University, Nanjing 210009, China

<sup>b</sup> Jiangsu Key Laboratory of Drug Screening, China Pharmaceutical University, Nanjing, China

<sup>c</sup> Jiangsu Key Laboratory of Drug Discovery for Metabolic Diseases, China Pharmaceutical University, Nanjing 210009, China

<sup>d</sup> Research Institute for Veterinary Science and College of Veterinary Medicine, Seoul National University, Seoul 08826, Korea

† These authors contributed equally to this work.

\* To whom correspondence should be addressed.

Professor Hu-Lin Jiang, State Key Laboratory of Natural Medicines, Department of Pharmaceutics, China Pharmaceutical University, Nanjing 210009, China

Tel: +86-25-83271027; Fax: +86-25-83271027; E-mail: [jianghulin3@163.com](mailto:jianghulin3@163.com)

Or

Professor Myung-Haing Cho, Laboratory of Toxicology, College of Veterinary  
Medicine, Seoul National University, Seoul 08826, Korea

Tel: +82-2-880-1276; Fax: +82-2-873-1268; Email: [mchotox@snu.ac.kr](mailto:mchotox@snu.ac.kr)

**Tab. S1. Mws of polyspermine with different reaction condition**

| Reaction Medium   | Volume | Temperature | Time | Mw (Da) |
|-------------------|--------|-------------|------|---------|
| Absolute Ethanol  | 9ml    | 45 °C       | 48h  | 2680    |
| Absolute Ethanol  | 9ml    | 80 °C       | 48h  | 3378    |
| Absolute Ethanol  | 9ml    | 80 °C       | 6d   | 18083   |
| Absolute Methanol | 15ml   | 60 °C       | 4d   | 17405   |
| Absolute Methanol | 6ml    | 60 °C       | 4d   | 39000   |
| Absolute Methanol | 6ml    | 60 °C       | 3d   | 21000   |
| Absolute Methanol | 6ml    | 60 °C       | 2d   | 13000   |
| Absolute Methanol | 6ml    | 60 °C       | 1d   | 5882    |
| Absolute Methanol | 6ml    | 60 °C       | 12h  | 5744    |

**Tab. S2. Particle size of PLGA-PSPE with different Mws by different method**

| PLGA(Da) | PSPE(Da) | Solvent added to aqueous phase |       | Aqueous added to solvent phase |       |
|----------|----------|--------------------------------|-------|--------------------------------|-------|
|          |          | Particle size                  | PDI   | Particle size                  | PDI   |
| 5K       | 2.6K     | 78.1±1.2                       | 0.109 | 256.9±3.2                      | 0.07  |
| 5K       | 5.8K     | 243.8±6.5                      | 0.243 | 497.9±6.7                      | 0.08  |
| 10K      | 5.8K     | 106±7.5                        | 0.156 | 445.9±14.9                     | 0.111 |
| 10K      | 13K      | 301.4±28.5                     | 0.259 | 542±18.5                       | 0.108 |
| 20K      | 5.8K     | 128.7±4.9                      | 0.148 | 267.8±5.9                      | 0.07  |
| 20K      | 21K      | 489.6±16.8                     | 0.224 | 590±33.8                       | 0.181 |
| 40K      | 21K      | 254.7±4.5                      | 0.094 | 712.7±38.5                     | 0.22  |

**Tab. S3. Drug loading of PLGA-PSPE with different Mws loading DHE by different method**

| PLGA(Da) | PSPE(Da) | Drug loading                   |                                |
|----------|----------|--------------------------------|--------------------------------|
|          |          | Solvent added to aqueous phase | Aqueous added to solvent phase |
| 5k       | 2.6k     | 0.64±0.11%                     | 1.7±0.4%                       |
| 10K      | 5.8K     | 1.51±0.41%                     | 4.21±1.4%                      |
| 20K      | 5.8K     | 2.12±0.68%                     | 11.65±2.1%                     |

**Tab. S4. Select of the optimal dosage forms of PLGA-PSPE/DHE**

| NO. | Water adding speed (ml/min) | Stirring rate (rpm) | Dosage of drug (mg) | Particle size (nm) | PDI   | Kcps  | Drug loading (100%) |
|-----|-----------------------------|---------------------|---------------------|--------------------|-------|-------|---------------------|
| 1   | 0.5                         | 200                 | 5                   | 299.3±1.0          | 0.045 | 372.0 | 2.46 ±0.3           |
| 2   | 0.5                         | 400                 | 10                  | 339.6±9.2          | 0.058 | 296.6 | 2.30 ±0.2           |
| 3   | 0.5                         | 800                 | 20                  | 297.6±1.5          | 0.089 | 337.6 | 11.65 ±2.1          |
| 4   | 1.5                         | 200                 | 10                  | 220.1±0.8          | 0.064 | 350.5 | 4.39 ±0.9           |
| 5   | 1.5                         | 400                 | 20                  | 254.5±0.7          | 0.038 | 458.4 | 6.41 ±1.2           |
| 6   | 1.5                         | 800                 | 5                   | 239.7±7.4          | 0.050 | 458.6 | 1.92 ±0.4           |
| 7   | 3.0                         | 200                 | 20                  | 224.7±8.1          | 0.050 | 480.5 | 5.38 ±1.3           |
| 8   | 3.0                         | 400                 | 5                   | 211.0±3.7          | 0.073 | 455.2 | 1.83 ±0.3           |
| 9   | 3.0                         | 800                 | 10                  | 218.7±1.9          | 0.037 | 456.6 | 4.784 ±0.6          |

The mass of PLGA-PSPE is 20mg.

**Tab. S5. Serum biochemical analysis**

| Parameter<br>(reference range)                    | Cont.     | PLGA-PSPE            | 0.5mg/kg<br>PLGA-PSPE/DHE | 1mg/kg<br>PLGA-PSPE/DHE   | DHE                   |
|---------------------------------------------------|-----------|----------------------|---------------------------|---------------------------|-----------------------|
| Aspartate aminotransferase (U/L)<br>(99.5 ± 33.4) | 56.7±13.8 | 47.2±13.5            | 42.6±6.0 <sup>SS</sup>    | 48.9±10.5                 | 76.5±31.7             |
| Alanine aminotransferase (U/L)<br>(41.4 ± 16.4)   | 29.9±13.1 | 28.7±6.9             | 28.6±6.9                  | 33.7±8.0                  | 38.7±10.9             |
| Total Protein(g/dL)<br>(5.4 ± 0.8)                | 4.7±0.2   | 4.1±0.3 <sup>*</sup> | 4.3±0.1 <sup>**</sup>     | 4.1±0.1 <sup>***,++</sup> | 4.4±0.4               |
| Albumin/Globulin (ratio)                          | 1.1±0.0   | 1.1±0.1              | 1.3±0.1                   | 1.3±0.1 <sup>**,#</sup>   | 1.3±0.1               |
| Blood urea nitrogen (mg/dL)<br>(32.7 ± 3.5)       | 23.0±4.0  | 20.4±2.1             | 23.8±4.7                  | 22.7±3.4                  | 24.3±2.9 <sup>#</sup> |
| Creatinine (mg/dL)<br>(0.5 ± 0.1)                 | 0.4±0.1   | 0.4±0.0              | 0.4±0.1                   | 0.4±0.0                   | 0.5±0.0               |

Biochemical analysis of serum after in vivo treatment. The treated groups have no meaningful changes in levels of liver damage indicators, alanine aminotransferase, alkaline phosphatase, total protein, and kidney damage indicators, blood urea nitrogen, creatinine in serum. Results are represented as mean ±SD. \*p < 0.05, \*\*p < 0.01, and \*\*\*p < 0.001 versus Cont., #p < 0.05 versus PLGA-PSPE, \$\$p < 0.01 versus DHE only, ++p < 0.01 versus 1mg/kg PLGA-PSPE/DHE.

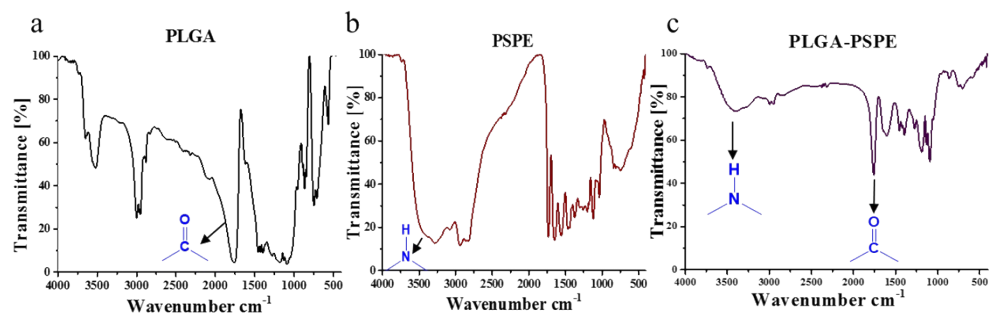

**Fig. S1.** Characterizations of PLGA, PSPE and PLGA-PSPE via IR

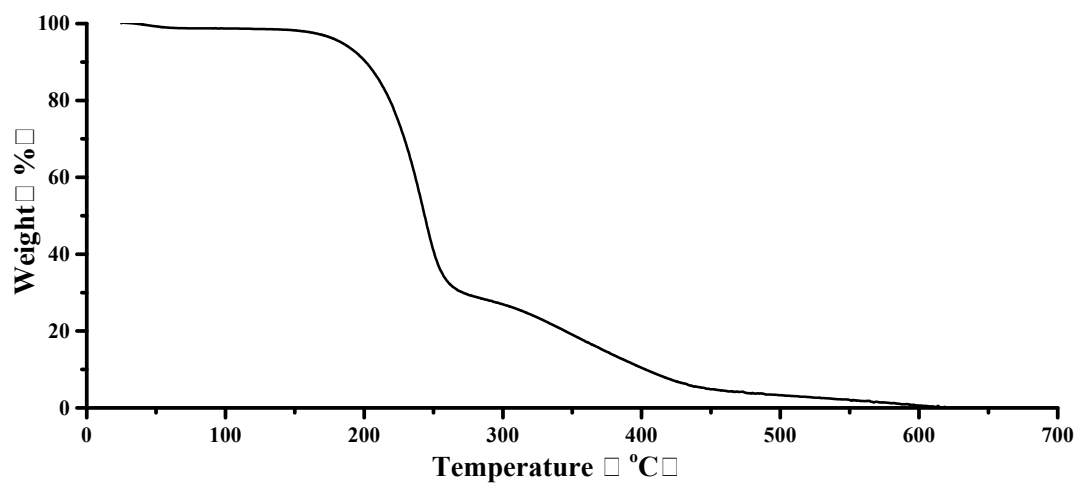

**Fig. S2.** TGA of PLGA-PSPE.

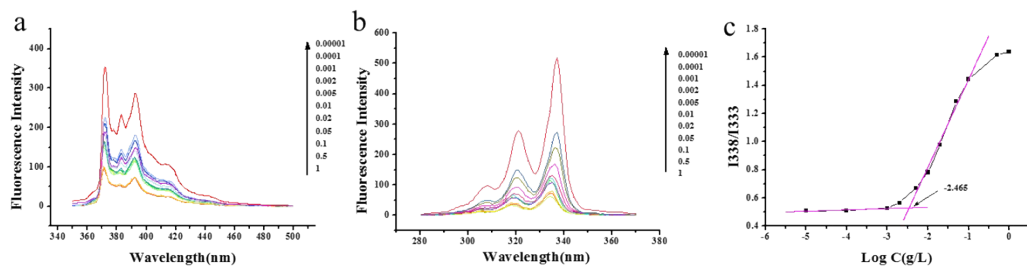

**Fig. S3.** CMC of PLGA-PSPE. (a) emission wavelength. (b) excitation wavelength. (c) Intensity ratios (I338/I333) of the emission spectra of pyrene-loaded PLGA-PSPE at with different concentrations of PLGA-PSPE.



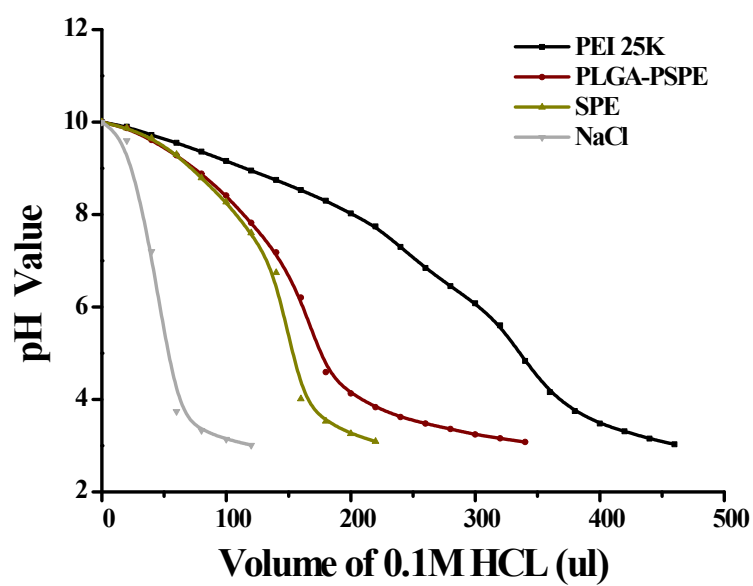

**Fig. S4.** Buffering capability assay of HPSPE, PEI 25 K. All samples were dissolved in 150 mM NaCl solution at a concentration of 0.2 mg/mL. The solution was brought to a starting pH of 10.0 with 0.1 M NaOH and then was titrated with 0.1 M HCl from 10.0 to 4.0.

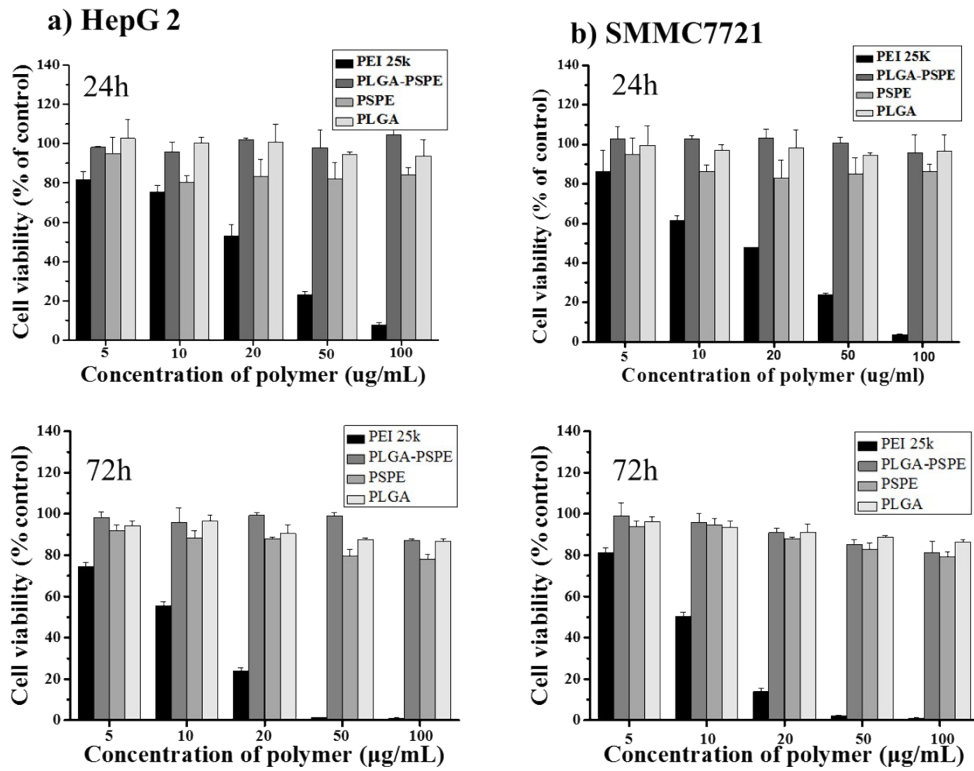

**Fig. S5.** Cytotoxicity of PLGA-PSPE at various concentrations in different cell (a) HepG2 cells and (b) SMMC7721 cells at 24 and 72 h. Results are represented as mean  $\pm$ SD, n=3.

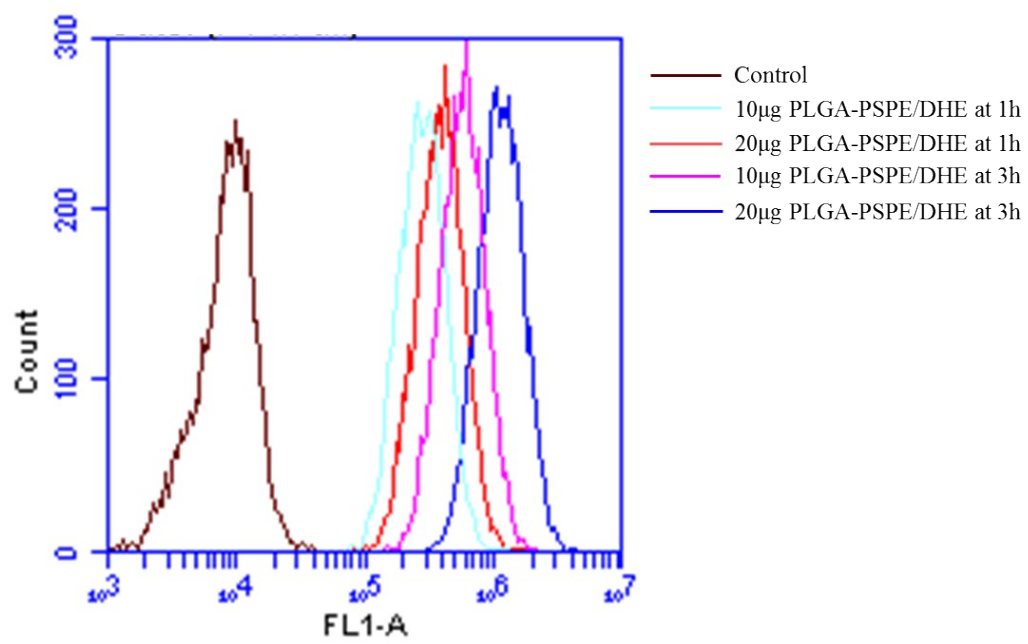

**Fig. S6.** Cellular uptake of PLGA-PSPE/DHE by FACS in A549 cells.

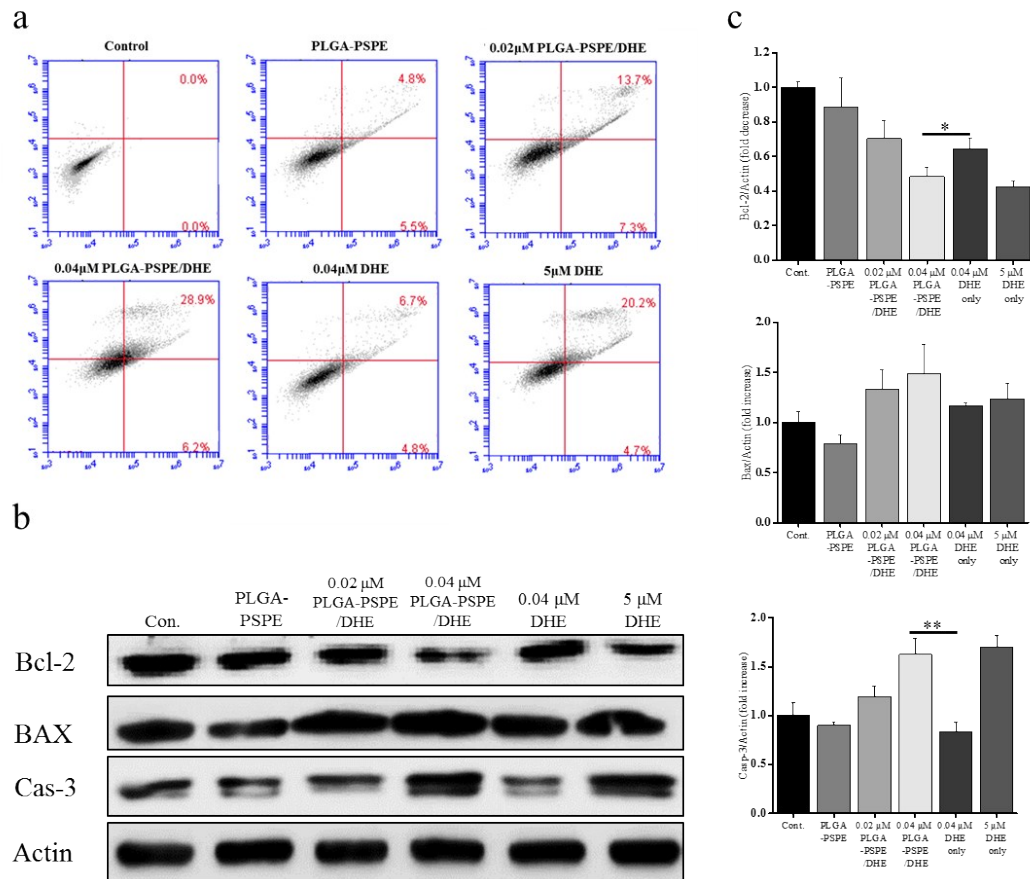

**Fig. S7.** In vitro apoptosis assay. (a) Flow cytometric analysis of apoptosis in A549 cells induced by various formulations. The lower-right and upper-right quadrants indicate the early apoptotic cells and the late apoptotic cells, respectively. (b) Western blot analyses of apoptosis-related proteins in A549 cells. (c) Densitometric analysis of Western blotting bands of apoptosis-related proteins in A549 cells. Results are represented as mean  $\pm$  SD. \* $p < 0.05$ , \*\* $p < 0.01$ .

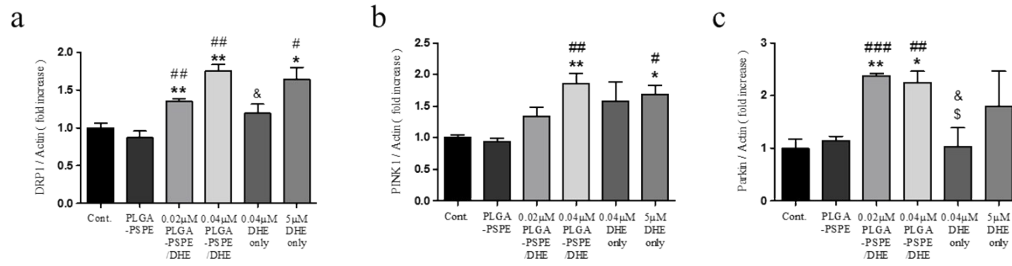

**Fig. S8.** Densitometric analysis of Western blotting bands of mitophagy-related proteins in A549 cells. Results are represented as mean  $\pm$  SD. \* $p < 0.05$ , and \*\* $p < 0.01$  versus Cont., # $p < 0.05$ , ## $p < 0.01$ , and ### $p < 0.001$  versus PLGA-PSPE, \$ $p < 0.05$  versus 0.02  $\mu$ M PLGA-PSPE/DHE, & $p < 0.05$  versus 0.04  $\mu$ M PLGA-PSPE/DHE.
